# Supplementary material for: Electrochemical fabrication and evaluation of a self-standing carbon nanotube/carbon fiber composite electrode for lithium-ion batteries
Source: Royal Society of Chemistry journal article supplement (doi:10.1039/c9ra05876a), 2019-01-01
Supplement: c9ra05876a1.pdf [file c9ra05876a1.pdf]

**Electrochemical fabrication and evaluation of self-standing carbon nanotube/carbon fiber composite electrode for lithium-ion batteries**  
**(Electronic Supplementary Information)**

Received 00th January 20xx,  
Accepted 00th January 20xx

DOI: 10.1039/x0xx00000x

[www.rsc.org/](http://www.rsc.org/)

Yi-Hung Liu\*<sup>a</sup>, Heng-Han Lin<sup>a</sup>, Tsung-Yu Tsai<sup>a</sup> and Chun-Han Hsu\*<sup>b</sup>

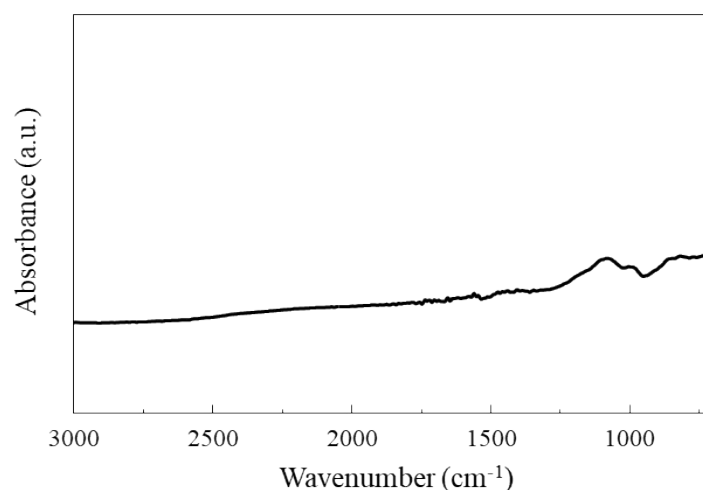

**Fig. S1** FT-IR spectrum of CNT/CF composite prepared by electrophoretic deposition.

<sup>a</sup> Department of Chemical and Materials Engineering, National Central University, No.300, Zhongda Road, Zhongli District, Taoyuan 32001, Taiwan

<sup>b</sup> General Education Center, National Tainan Junior College of Nursing, 78, Sec. 2, Minzu Rd., Tainan 700, Taiwan

**Table S1.** Summary of the best fitting results for the impedance spectra of CF and CNT/CF electrodes. (Frequency range: 0.1 MHz to 0.1 Hz)

| Element              | CF                    | CNT/CF                |
|----------------------|-----------------------|-----------------------|
| $R_s$                | 3.189                 | 12.47                 |
| $R_{\text{int}}$     | 2638                  | Unused                |
| $C_{\text{int}}$     | 0.014                 |                       |
| $R_{\text{SEI}}$     | 3605                  | 58.34                 |
| $CPE_{\text{SEI-T}}$ | $6.12 \times 10^{-4}$ | $8.44 \times 10^{-6}$ |
| $CPE_{\text{SEI-P}}$ | 0.705                 | 0.824                 |
| $R_{\text{ct}}$      | 6.041                 | 44.72                 |
| $C_{\text{ct}}$      | $4.91 \times 10^{-7}$ | $1.80 \times 10^{-5}$ |
| $W\text{-R}$         | 228.6                 | 263.6                 |
| $W\text{-T}$         | $1.86 \times 10^{-3}$ | 2.978                 |
| $W\text{-P}$         | 0.455                 | 0.440                 |
